# Supplementary material for: Immunoglobulin G Expression in Lung Cancer and Its Effects on Metastasis
Source: PLOS journal article supplement (doi:10.1371/journal.pone.0097359), 2014-05-22
Supplement: S1 (10.1371/journal.pone.0097359.s001) [file journal.pone.0097359.s001]

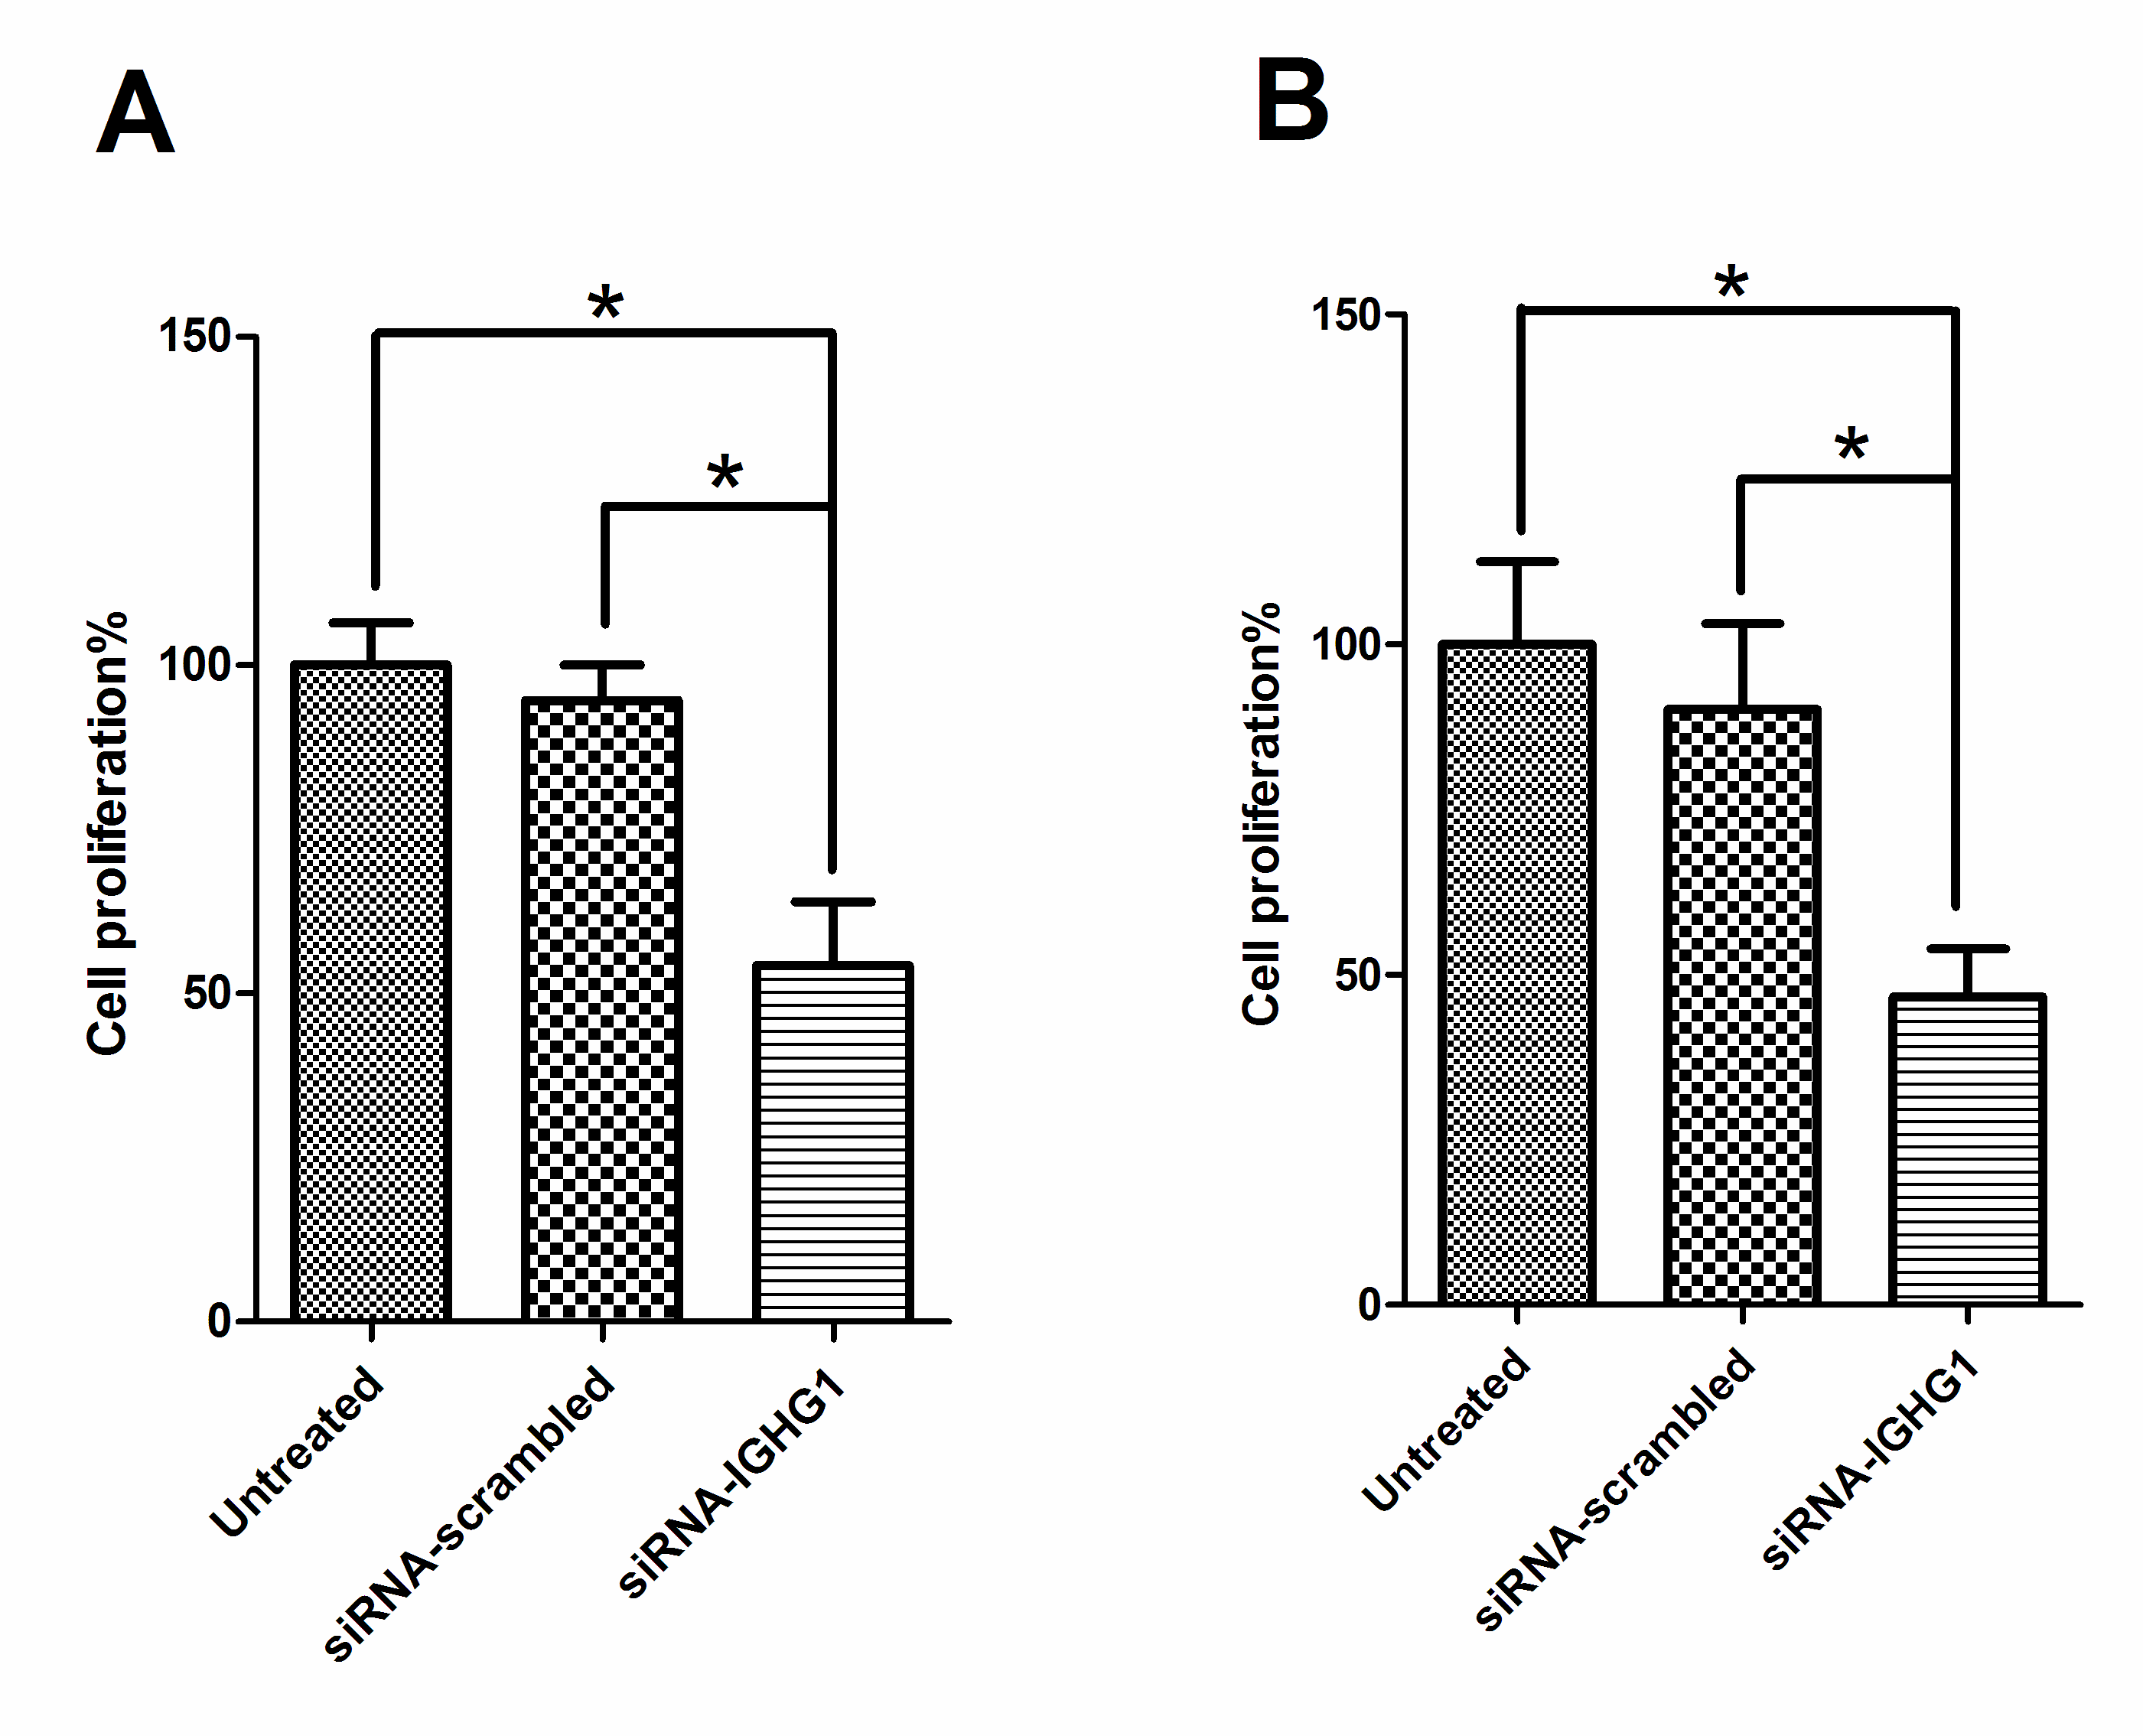


**Figure S1. IGHG1 siRNA induced reduction of IgG expression inhibited lung cancer cell proliferation.** A, A549 cell line. B, SK-MES-1 cell line. The histograms represent the three independent assays. Data are presented as mean ± S.E. *, p < 0.05.
