# Supplementary material for: Immunoglobulin G Expression in Lung Cancer and Its Effects on Metastasis
Source: PLOS journal article supplement (doi:10.1371/journal.pone.0097359), 2014-05-22
Supplement: S2 (10.1371/journal.pone.0097359.s002) [file journal.pone.0097359.s002]

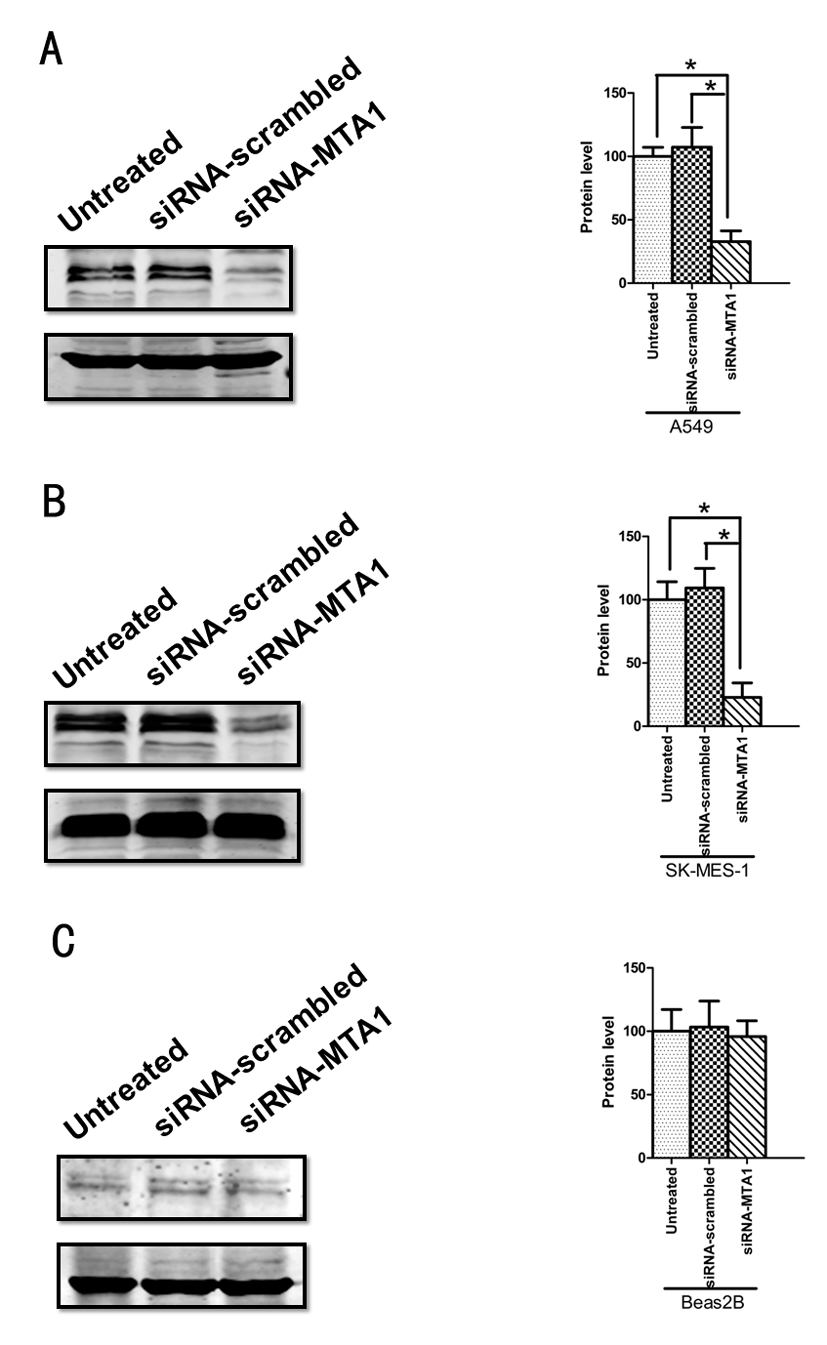


**Figure S2. MTA1 was down-regulated with specific MTA1 siRNA transfection with Western blot.** A, typical bands represent the changes of MTA1 expression after MTA1 siRNA interference in A549 cell line. B, the similar changes in SK-MES-1 cell line. C, MTA1 is weakly expressed in Beas2B and is almost not influenced after siRNA interference to MTA1. The histograms represent the four independent assays. Data are presented as mean ± S.E. ∗, p < 0.05. Scale bars: 20 μm.
