# Supplementary material for: Immunoglobulin G Expression in Lung Cancer and Its Effects on Metastasis
Source: PLOS journal article supplement (doi:10.1371/journal.pone.0097359), 2014-05-22
Supplement: S3 (10.1371/journal.pone.0097359.s003) [file journal.pone.0097359.s003]

**
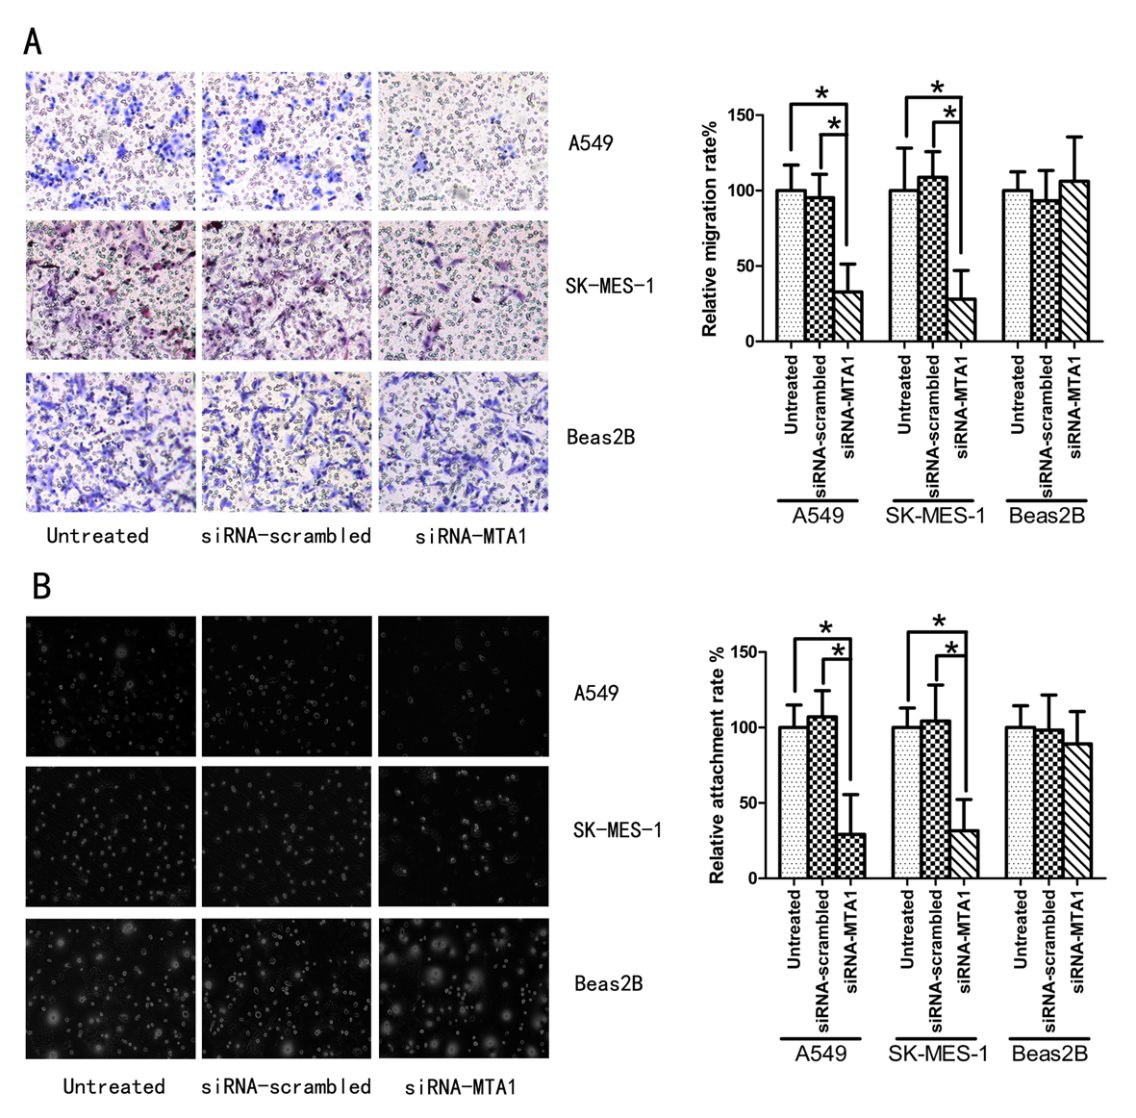
**

**Figure S3. MTA1 down-regulation inhibits lung cancer cell migration and attachment.** With specific MTA1 siRNA transfection, the ability of migration and attachment of lung cancer cells was reduced markedly in A549 and SK-MES-1 cells, whereas not in Beas2B cells. A, representative photographs (200×) of transwell assays. B, representative photographs (200×) of attachment assays. The histograms represent the four independent assays. Data are presented as mean ± S.E. ∗, p < 0.05.
