# Supplementary material for: Immunoglobulin G Expression in Lung Cancer and Its Effects on Metastasis
Source: PLOS journal article supplement (doi:10.1371/journal.pone.0097359), 2014-05-22
Supplement: S4 (10.1371/journal.pone.0097359.s004) [file journal.pone.0097359.s004]

**
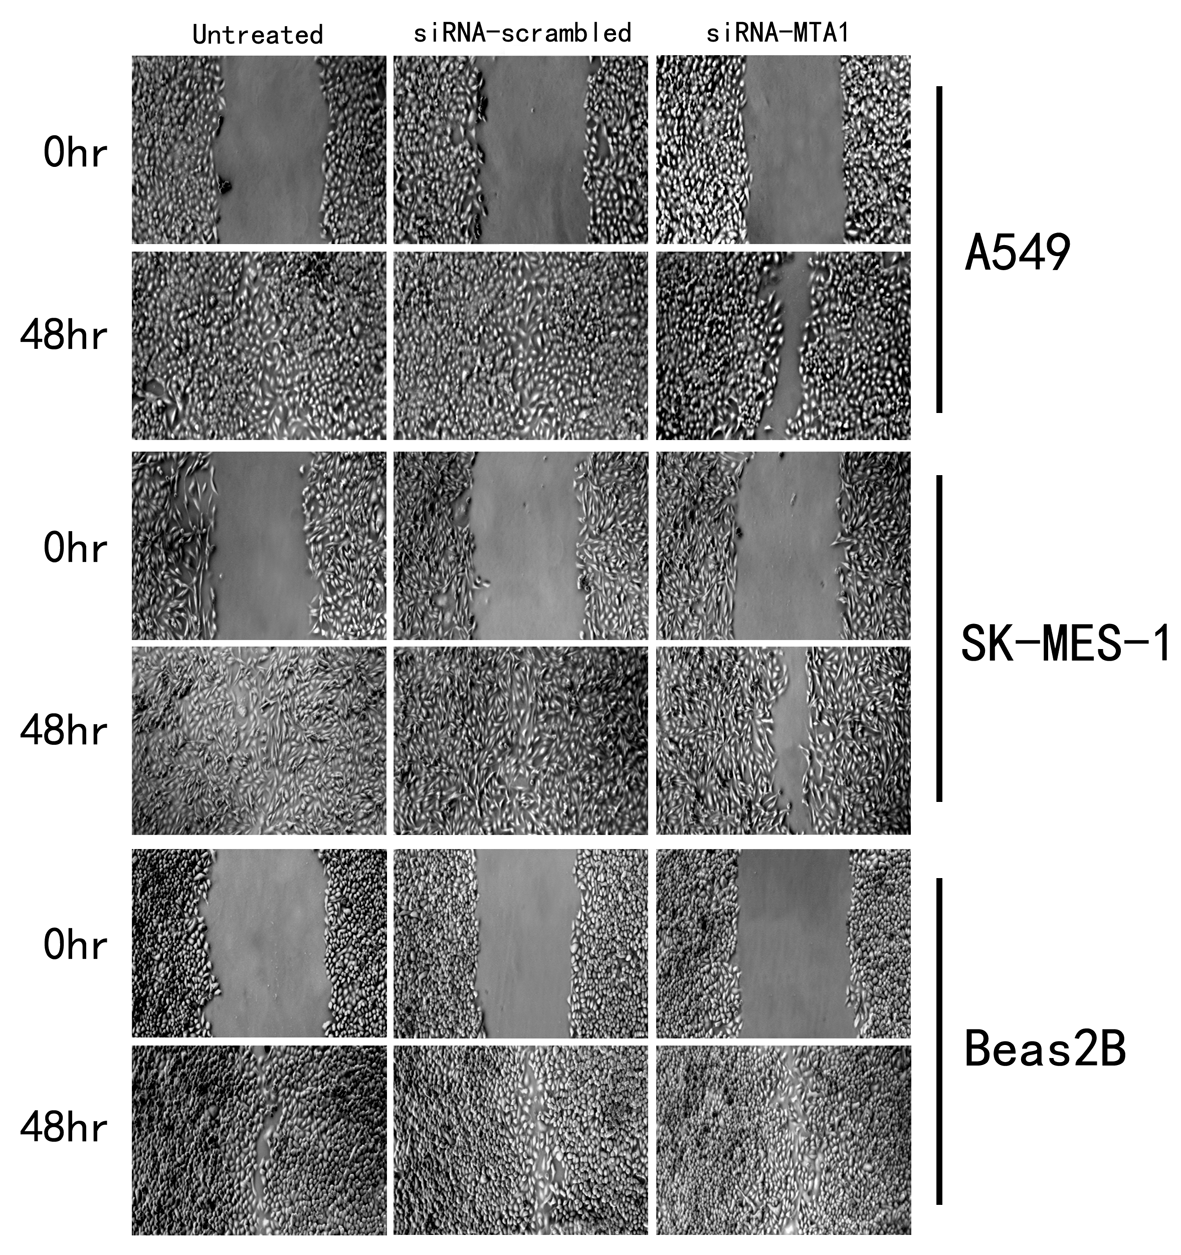
**

**Figure S4. MTA1 down-regulation inhibits cell migration by wound healing assay in lung cancer cells.** Forty-eight hours after scratching the cells, scratched areas were photographed. The results show that for the untreated and siRNA-scrambled groups, the wound area is markedly narrow in A549 and SK-MES-1 than that in Beas2B.
