# Supplementary material for: Immunoglobulin G Expression in Lung Cancer and Its Effects on Metastasis
Source: PLOS journal article supplement (doi:10.1371/journal.pone.0097359), 2014-05-22
Supplement: S6 (10.1371/journal.pone.0097359.s006) [file journal.pone.0097359.s006]

**Table S2. Primers used in RT-PCR and LMD coupled with RT-PCR.**

| Gene | Primers(5'-3') | Sizes（bp） | Across introns |
| --- | --- | --- | --- |
| IGHG1 | Outer primers  ACGGCGTGGAGGTGCATAATG (sense)  CGGGAGGCGTGGTCTTGTAGTT (antisense)  Inner primers  GACTGGCTGAATGGCAAGGAG (sense)  GGCGATGTCGCTGGGATAGAA (antisense) | 201 | Yes |
| IgH variable | Outer primers  GAGGTGCAGCTGGTGCAGTCTGG (sense)  ACACCGTCACCGGTTCGG (antisense)  Inner primers  GAGGTGCAGCTGGTGCAGTCTGG (sense)  TGAGGAGACGGTGACC (antisense) | About 380 | Yes |
| Igκ  constant | TGAGCAAAGCAGACTACGAGA(sense)  GGGGTGAGGTGAAAGATGAG(antisense) | 231 | No |
| Igκ  Variable | GACATCCAGATGACCCAGTCTCCA(sense)  CAGCTTGGTCCCCTGGCCAAAACTGTACA (antisense) | About 215 | Yes |
| Igλ  Constant | GAGCCTGACGCCTGAG(sense)  ATTGAGGGTTTATTGAGTGCAG(antisense) | 223 | Yes |
| Igλ  Variable | TCTTCTGAGCTGACTCAGGACCCTGCT (sense)  CGGTCAGCTCGGTCCCCTCACCA (antisense) | About 200 | Yes |
| Iγ-Cγ | Outer primers  GGGCTTCCAAGCCAACAGGGCAGGACA(sense)  GTTGCCGTTGGGGTGCTGGAC(antisense)  Inner primers  CAGCAGCCCTCTTGGCAGGCAGCCAG(sense)  CAAGCTGCTGGAGGGCACGGT(antisense) | 293 | Yes |
| RAG1 | Outer primers  TGGATCTTTACCTGAAGATG(sense)  CTTGGCTTTCCAGAGAGTCC（antisense）  Inner primers  CACAGCGTTTTGCTGAGCTC（sense）  AGCTTGCCTCAGGGTTCATG（antisense） | 327 | No |
| RAG2 | Outer primers  TGGAAGCAACATGGGAAATG（sense）  CATCATCTTCATTATAGGTGTC（antisense）  Inner primers  TTCTTGGCATACCAGGAGAC（sense）  CTATTTGCTTCTGCACTG（antisense） | 193 | No |
| AID | Outer primers  GAAGAGGCGTGACAGTGCT（sense）  CGAAATGCGTCTCGTAAGT（antisense）  Inner primers  CCTTTTCACTGGACTTTGG（sense）  TGATGGCTATTTGCACCCC（antisense） | 294 | Yes |
| CD19 | TACTATGGCACTGGCTGCTG（sense）  CACGTTCCCGTACTGGTTCT（antisense） | 218 | Yes |
| GAPDH | ACCACAGTCCATGCCCATCAC（sense）  TCCACCACCCTGTTGCTGTA（antisense） | 452 | Yes |
